# Supplementary material
Source: publisher figshare collection journal article supplement (https://acs.figshare.com/ndownloader/files/4125721)
Supplement: Supplementary file 1 [file 4125721]

## Supporting Information for

### **Composite microspheres for separation of plasmid DNA decorated with MNPs through in situ growth or interfacial immobilization followed by silica coating**

*Shuai Xu, Xiaojie Song, Jia Guo, and Changchun Wang\**

State Key Laboratory of Molecular Engineering of Polymers, Department of Macromolecular Science, and Laboratory of Advanced Materials, Fudan University, Shanghai, 200433, People's Republic of China.

\*Corresponding author. E-mail: [ccwang@fudan.edu.cn](mailto:ccwang@fudan.edu.cn)

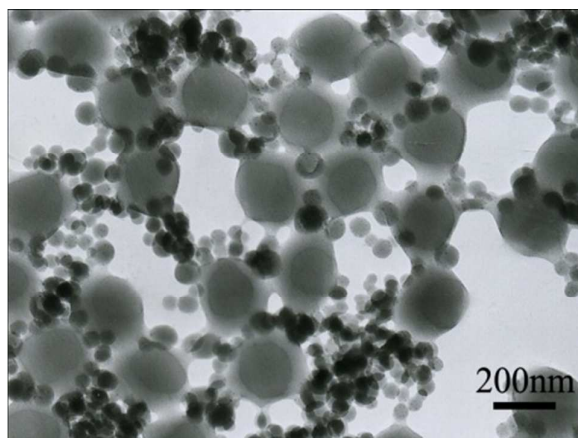

**Figure S1.** TEM image of polymer/magnetite composite microspheres from unmodified epoxy-capped polymer seeds.

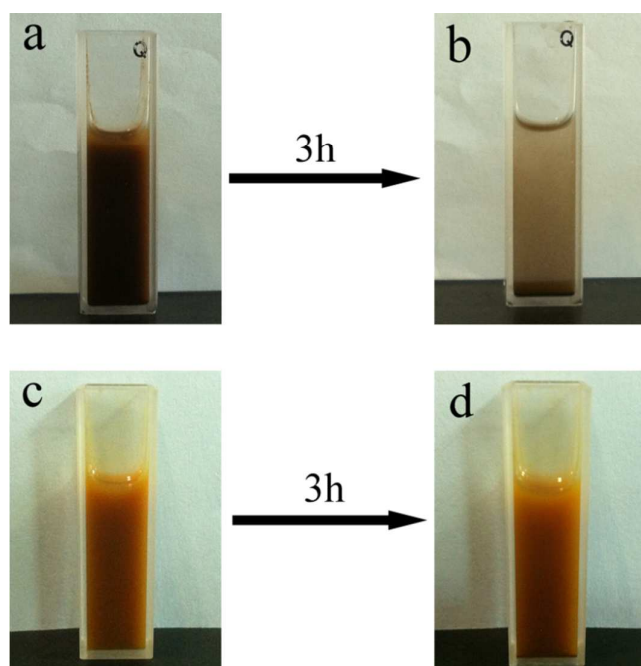

**Figure S2.** Photographs of stability test in PBS (0.1M, pH 7.4) and standing for 3h of non-stabilized microspheres (a, b) and sodium citrate stabilized microspheres (c, d)

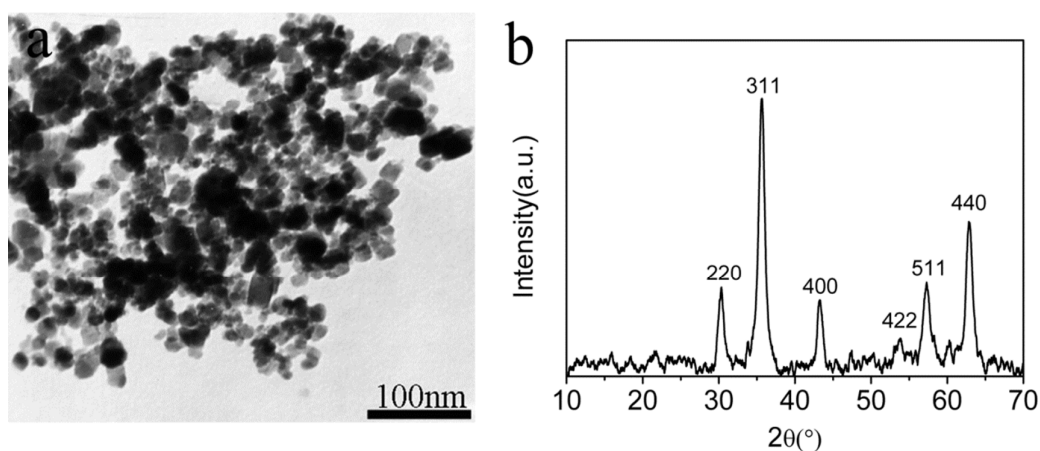

**Figure S3.** (a) TEM image and (b) Powder XRD pattern of citrate acid stabilized magnetic nanoparticles through coprecipitation method.

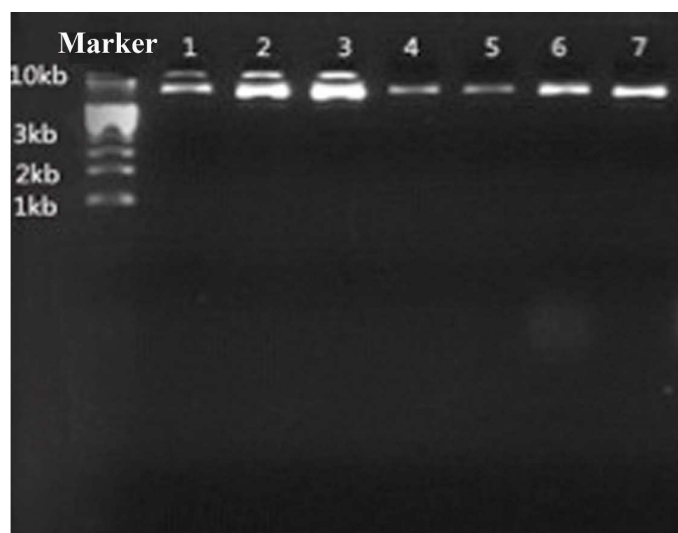

**Figure S4.** Agarose gel electrophoresis of the extracted plasmid DNA.

**Table S1.** Quantitive size measurement of MNPs as functions of weight ratio ( $\text{FeCl}_3$ : PSG-COOH) and sodium citrate amount in Figures 3.

| Figure | Weight ratio of<br>$\text{FeCl}_3$ : PSG-COOH | Sodium citrate<br>feeding amount/mg | Diameter of MNPs<br>in average/nm |
|--------|-----------------------------------------------|-------------------------------------|-----------------------------------|
| 3a     | 4:1                                           | 0                                   | 180                               |
| 3b     | 2:1                                           | 0                                   | 110                               |
| 3c     | 1:1                                           | 0                                   | 95                                |
| 3d     | 1:1                                           | 5                                   | 60                                |
| 3e     | 1:1                                           | 10                                  | 40                                |
| 3f     | 1:1                                           | 25                                  | 15                                |

**Table S2.** Quantitive size measurement of MNPs in Figures 4 and Figure S2

| Figure | Diameter of MNPs<br>in average/nm |
|--------|-----------------------------------|
| 4a     | 50                                |
| S2     | 32                                |

**Table S3.** Concentration of the extracted plasmid DNA in elution solution

| Sample | 260   | 280   | 260/280 | Concentration (ng/ml) <sup>a</sup> |
|--------|-------|-------|---------|------------------------------------|
| 1      | 0.178 | 0.098 | 1.823   | 178.21                             |
| 2      | 1.701 | 0.823 | 2.067   | 1701.18                            |
| 3      | 0.976 | 0.478 | 2.039   | 975.53                             |
| 4      | 0.065 | 0.036 | 1.802   | 65.29                              |
| 5      | 0.146 | 0.077 | 1.891   | 145.82                             |
| 6      | 0.247 | 0.123 | 2.016   | 247.36                             |
| 7      | 0.354 | 0.192 | 1.841   | 354.36                             |

<sup>a</sup> The DNA concentrations are automatically obtained from the Microplate reader after 2  $\mu$ l addition of the specific sample.
